# Supplementary material for: Synthesis and Anticancer Activity Evaluation of 5-[2-Chloro-3-(4-nitrophenyl)-2-propenylidene]-4-thiazolidinones
Source: MDPI journal article supplement (doi:10.3390/molecules26103057), 2021-05-20
Supplement: s1 [file s1]

Supplementary information

# Synthesis and Anticancer Activity Evaluation of 5-[-2-Chloro-3-(4-nitrophenyl)-2-propenylidene]-4-thiazolidinones

Kamila Buzun <sup>1</sup>, Anna Kryshchyshyn-Dylevych <sup>2</sup>, Julia Senkiv <sup>3</sup>, Olexandra Roman <sup>2</sup>, Krzysztof Bielawski <sup>4</sup>, Anna Bielawska <sup>1</sup> and Roman Lesyk <sup>2,5\*</sup>

<sup>1</sup> Department of Biotechnology, Medical University of Bialystok, Jana Kilińskiego 1, Bialystok, 15-089, Poland; kamila.buzun@umb.edu.pl (K.B.), anna.bielawska@umb.edu.pl (A.B.)

<sup>2</sup> Department of Pharmaceutical, Organic and Bioorganic Chemistry, Danylo Halytsky Lviv National Medical University, Pekarska 69, Lviv, 79010, Ukraine; kryshchyshyn.a@gmail.com (A.K.-D.), lesia\_roman@ukr.net (O.R.), dr\_r\_lesyk@org.lviv.net (R.L.)

<sup>3</sup> Institute of Cell Biology of National Academy of Sciences of Ukraine, 14/16 Drahomanov Str., Lviv 79005, Ukraine; yu.senkiv@gmail.com

<sup>4</sup> Department of Synthesis and Technology of Drugs, Medical University of Bialystok, 15-089 Bialystok, Poland; kbiel@umb.edu.pl

<sup>5</sup> Department of Public Health, Dietetics and Lifestyle Disorders, Faculty of Medicine, University of Information Technology and Management in Rzeszow, 35-225 Rzeszow, Poland

\* Correspondence: dr\_r\_lesyk@org.lviv.net; Tel.: +380322755966

**Supplementary data:** The NMR spectra of compounds 2a-l

**Citation:** Buzun, K.; Kryshchyshyn-Dylevych, A.; Senkiv, J.; Roman, O.; Bielawski, K.; Bielawska, A.; Lesyk, R. Synthesis and Anticancer Activity Evaluation of 5-[-2-Chloro-3-(4-nitrophenyl)-2-propenylidene]-4-thiazolidinones. *Molecules* **2021**, *26*, x. <https://doi.org/10.3390/xxxxx>

Received: date

Accepted: date

Published: date

**Publisher's Note:** MDPI stays neutral with regard to jurisdictional claims in published maps and institutional affiliations.

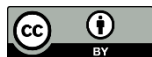

**Copyright:** © 2021 by the authors. Submitted for possible open access publication under the terms and conditions of the Creative Commons Attribution (CC BY) license (<http://creativecommons.org/licenses/by/4.0/>).

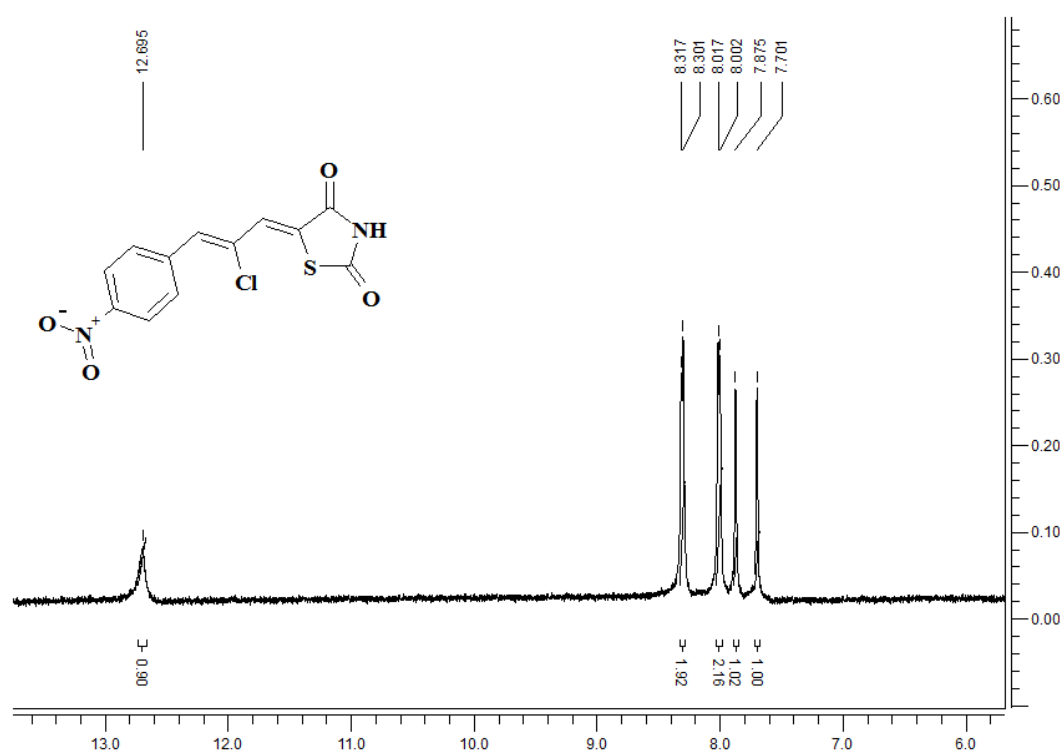Figure S1. <sup>1</sup>H NMR spectrum 2a.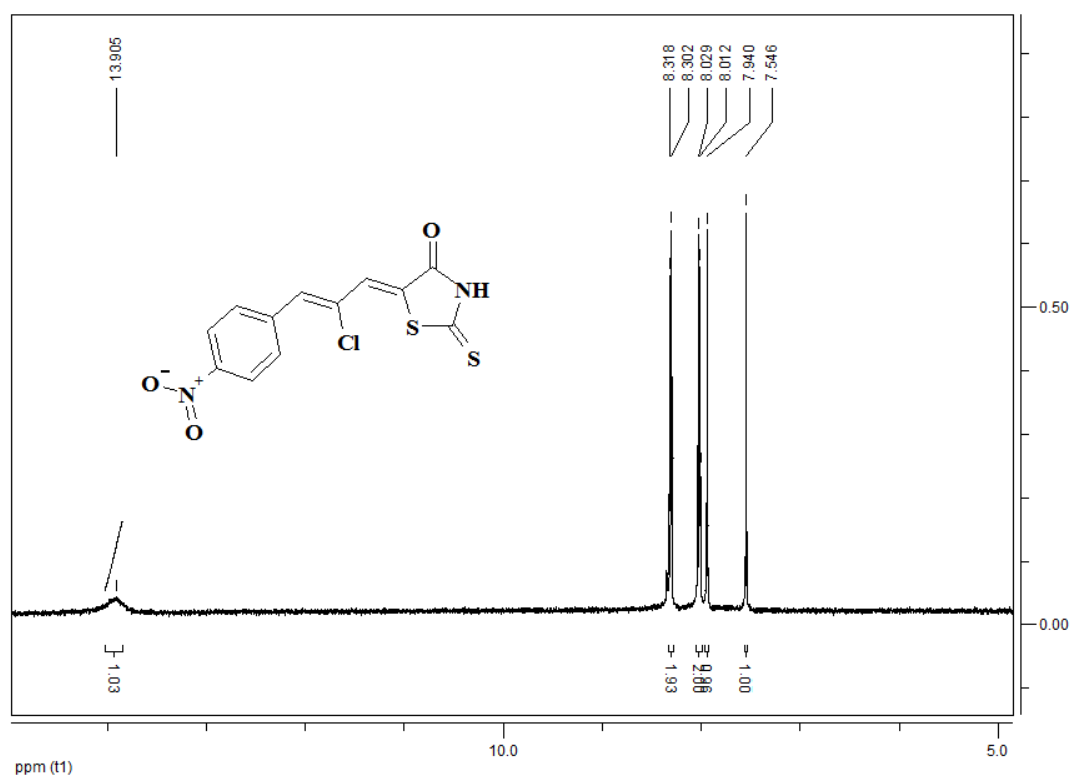Figure S2. <sup>1</sup>H NMR spectrum 2b.

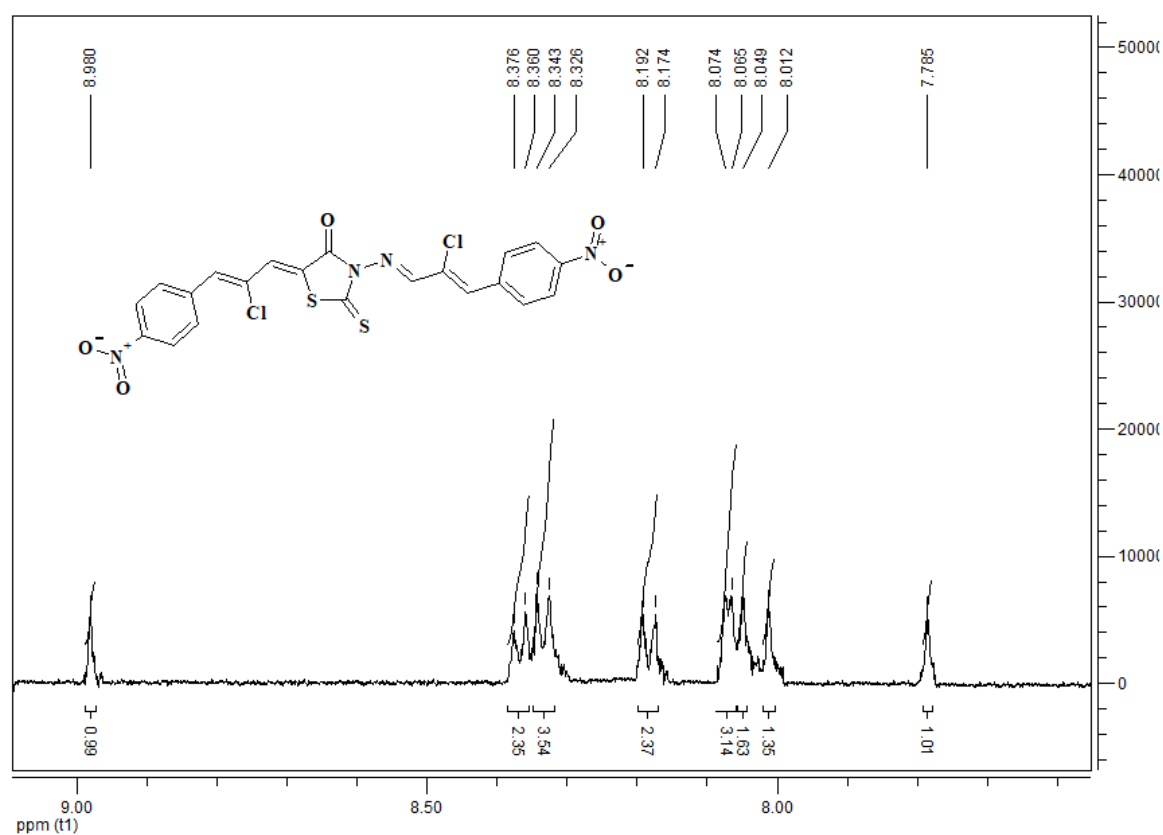Figure S3. <sup>1</sup>H NMR spectrum 2c.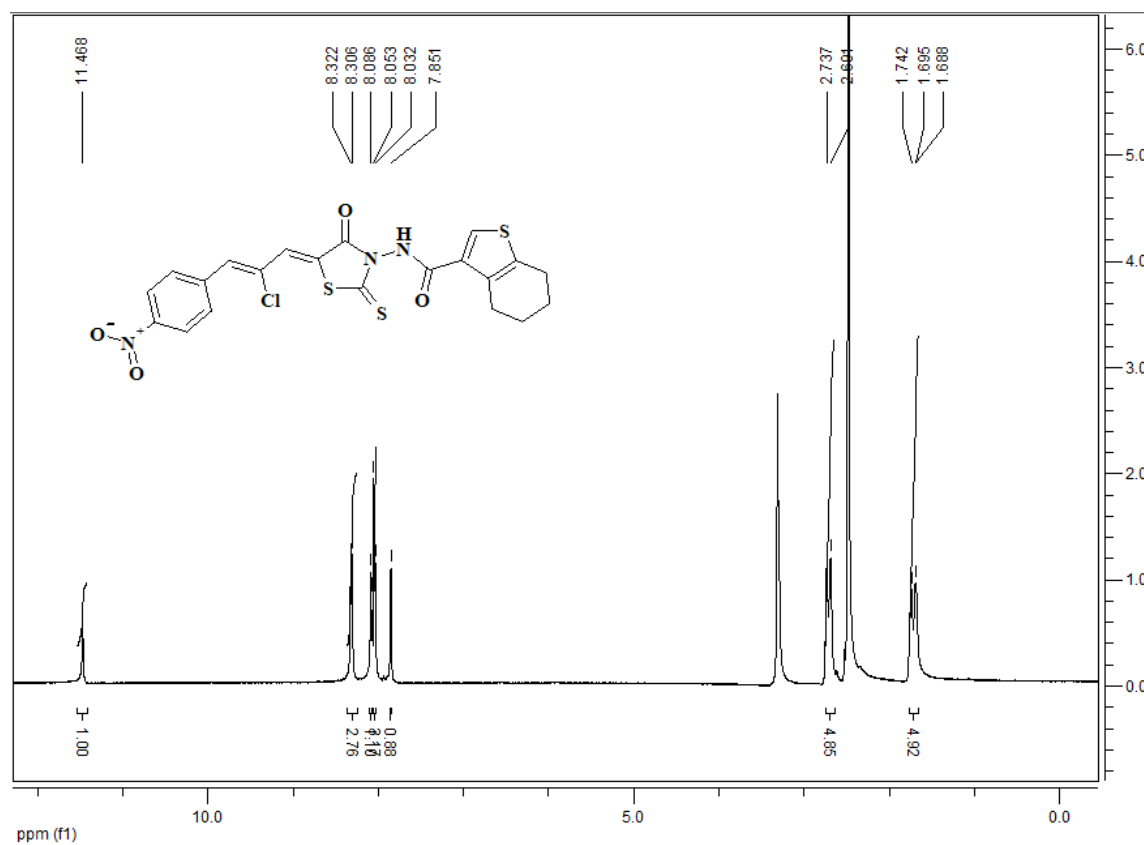Figure S4. <sup>1</sup>H NMR spectrum 2d.

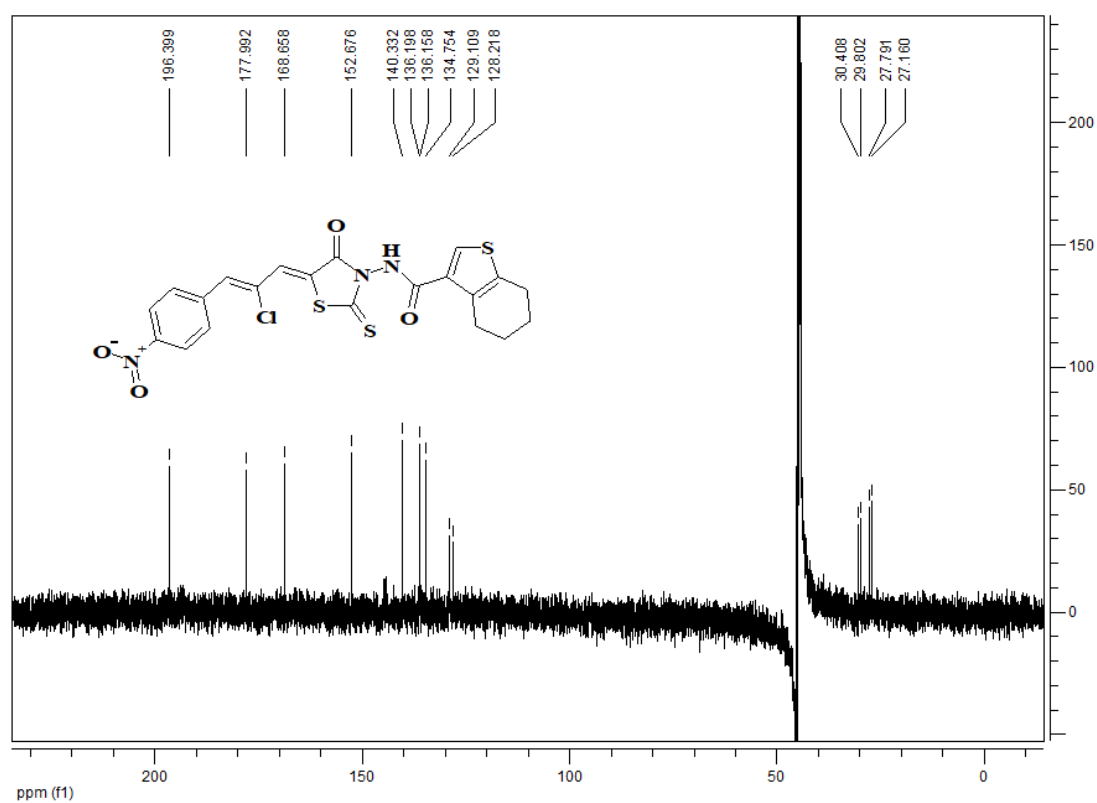Figure S5.  $^{13}\text{C}$  NMR spectrum 2d.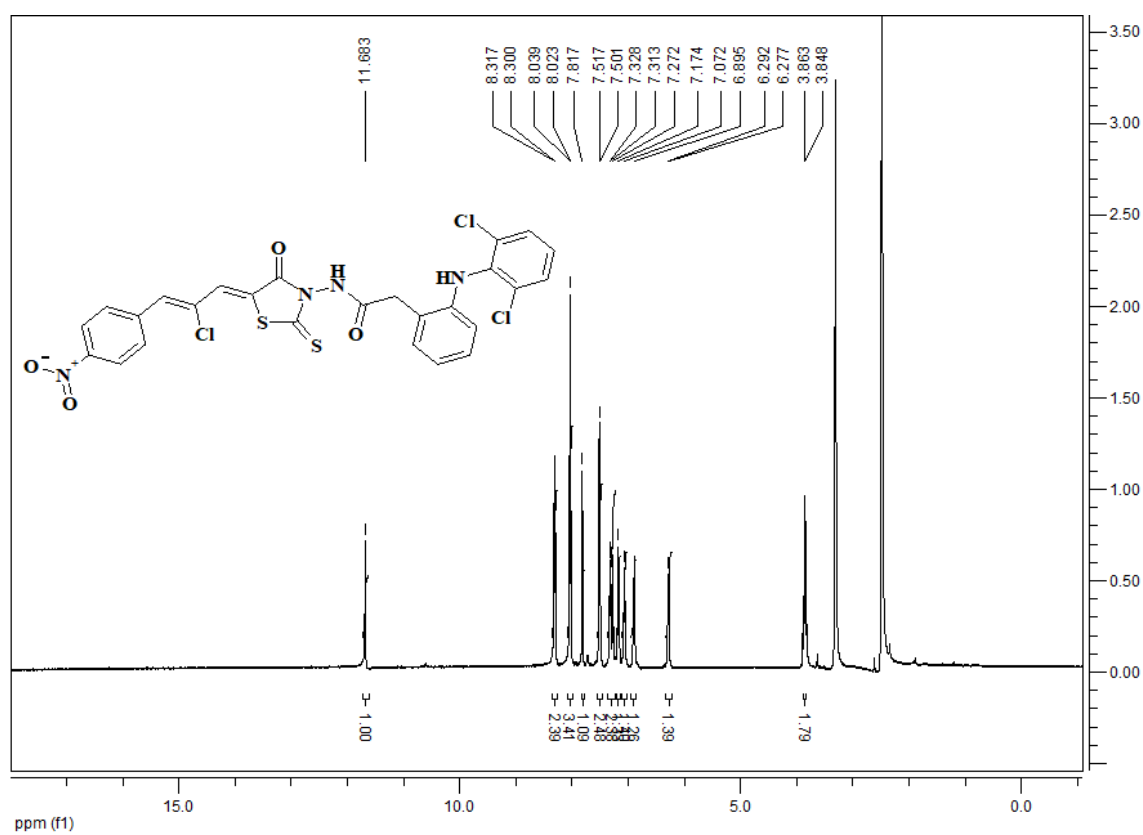Figure 6.  $^1\text{H}$  NMR spectrum 2e.

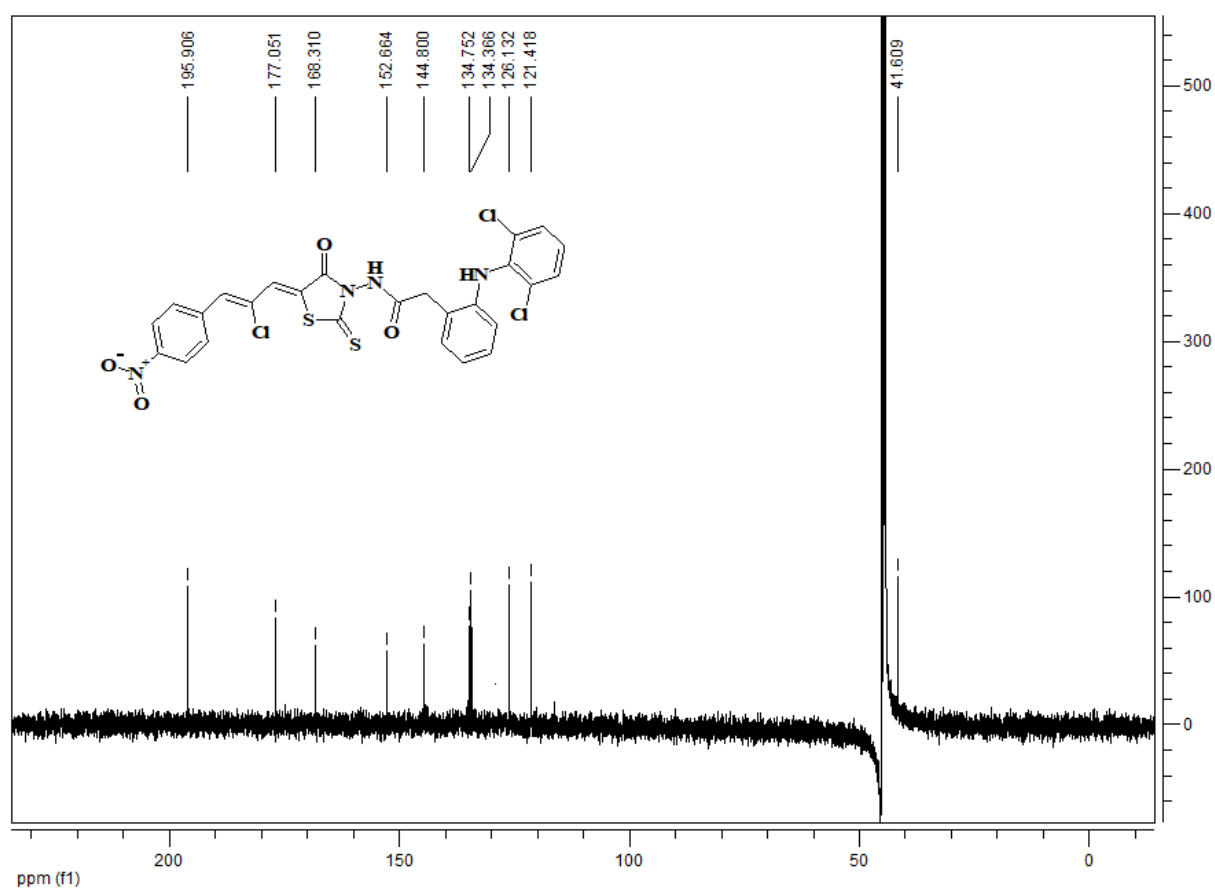Figure S7. <sup>13</sup>C NMR spectrum 2e.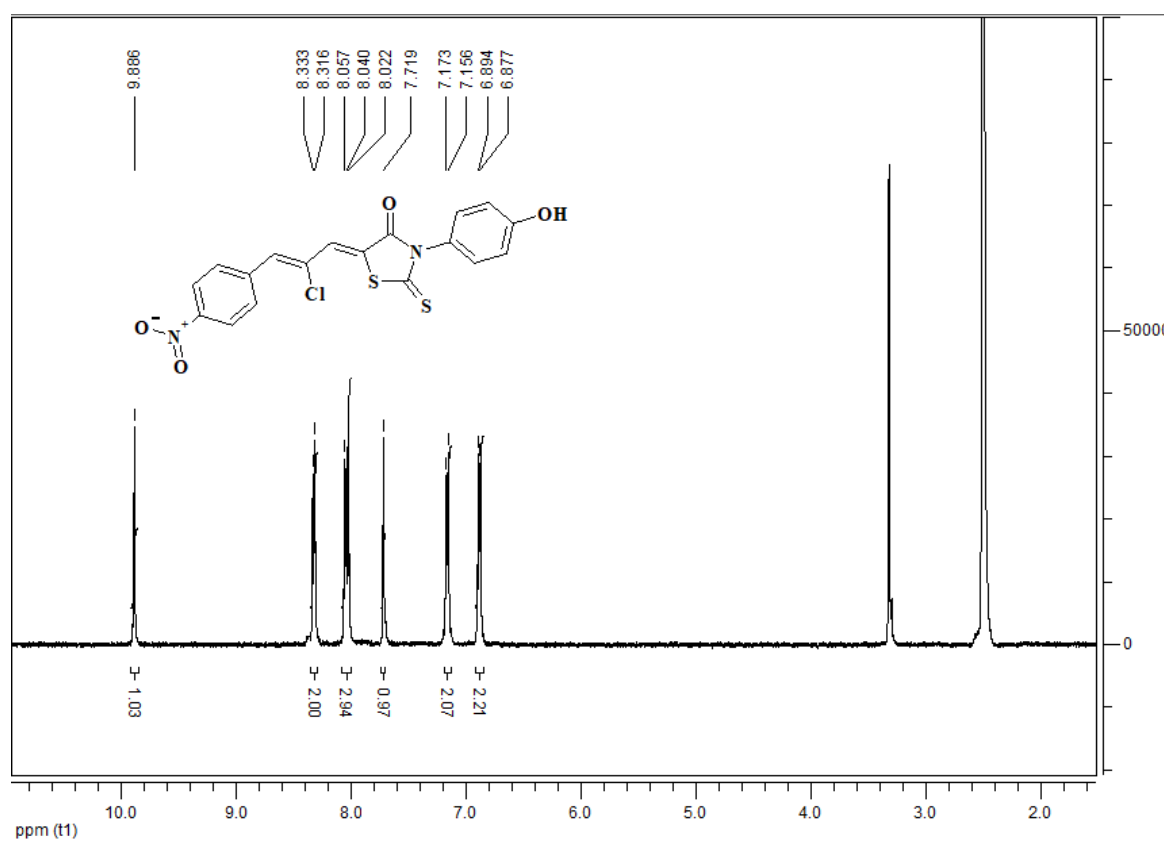Figure S8. <sup>1</sup>H NMR spectrum 2f.

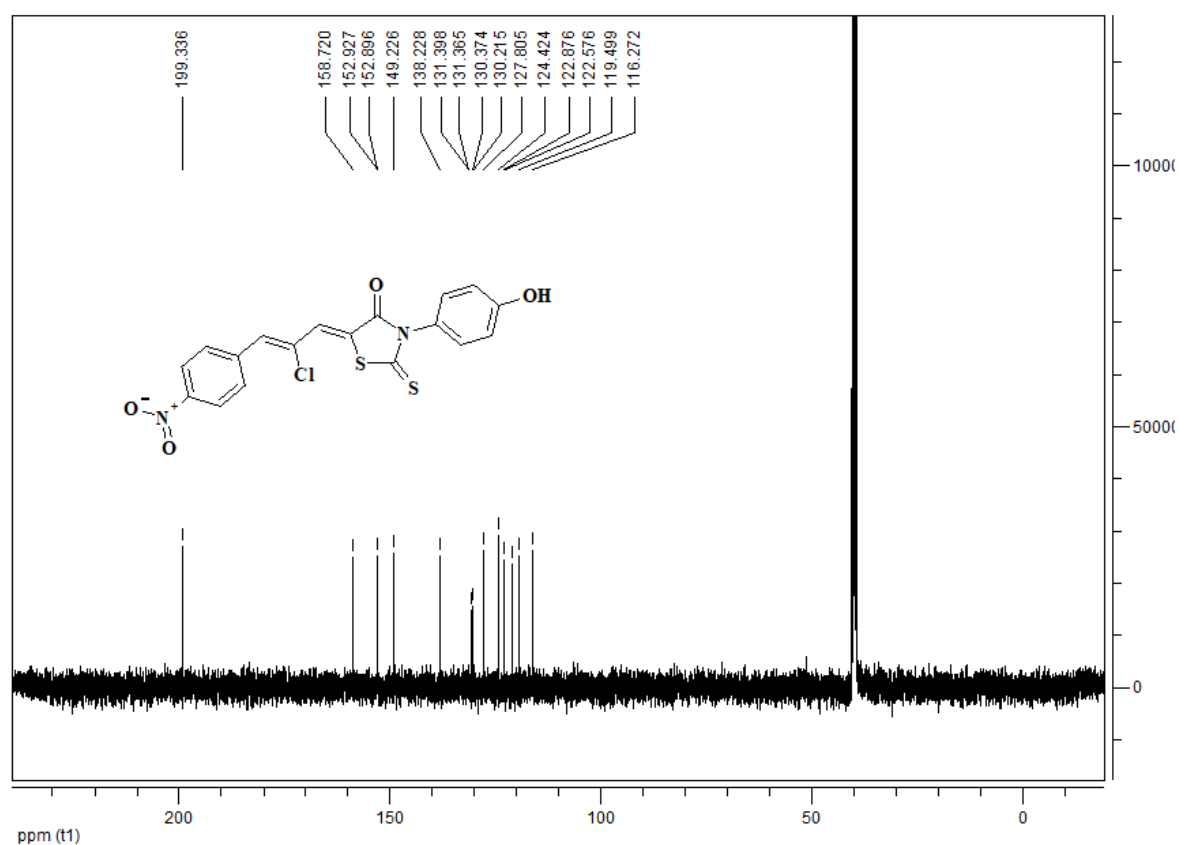Figure S9. <sup>13</sup>C NMR spectrum 2f.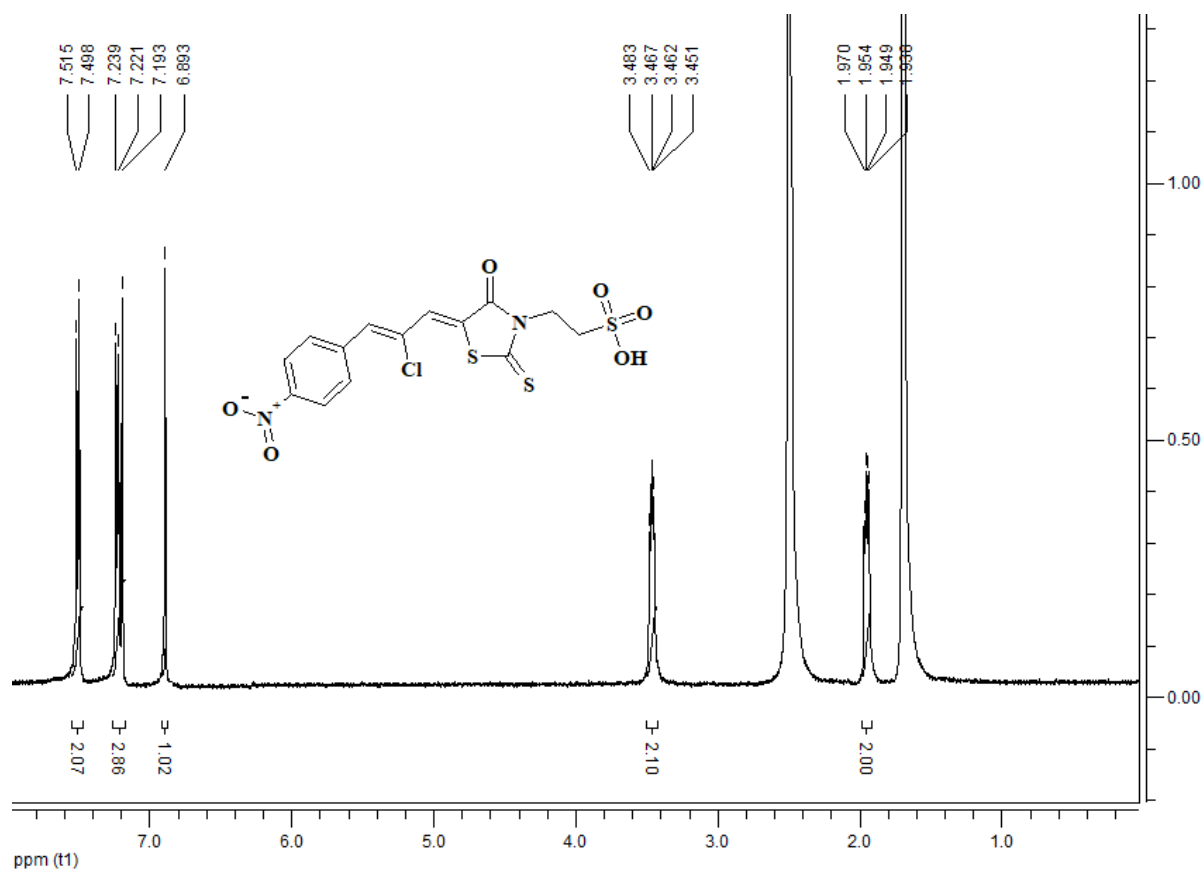Figure S10. <sup>1</sup>H NMR spectrum 2g.

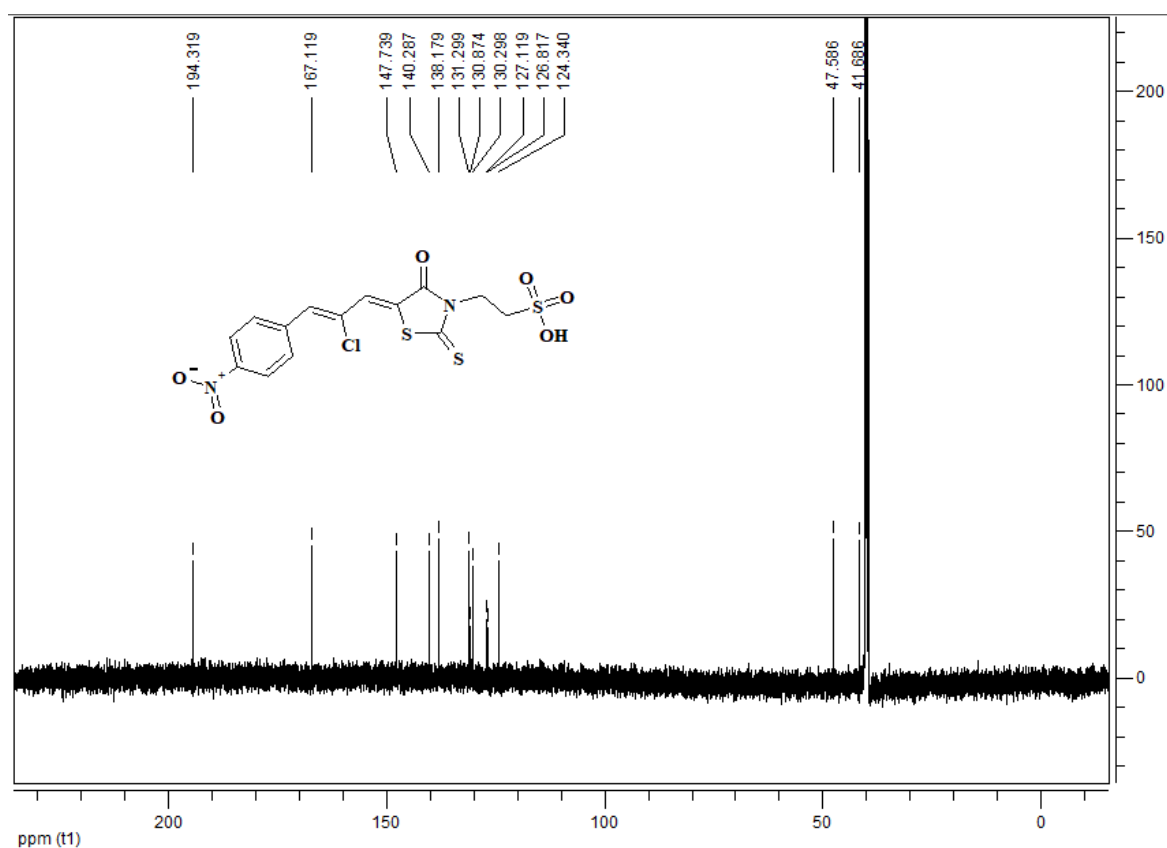Figure S11. <sup>13</sup>C NMR spectrum 2g.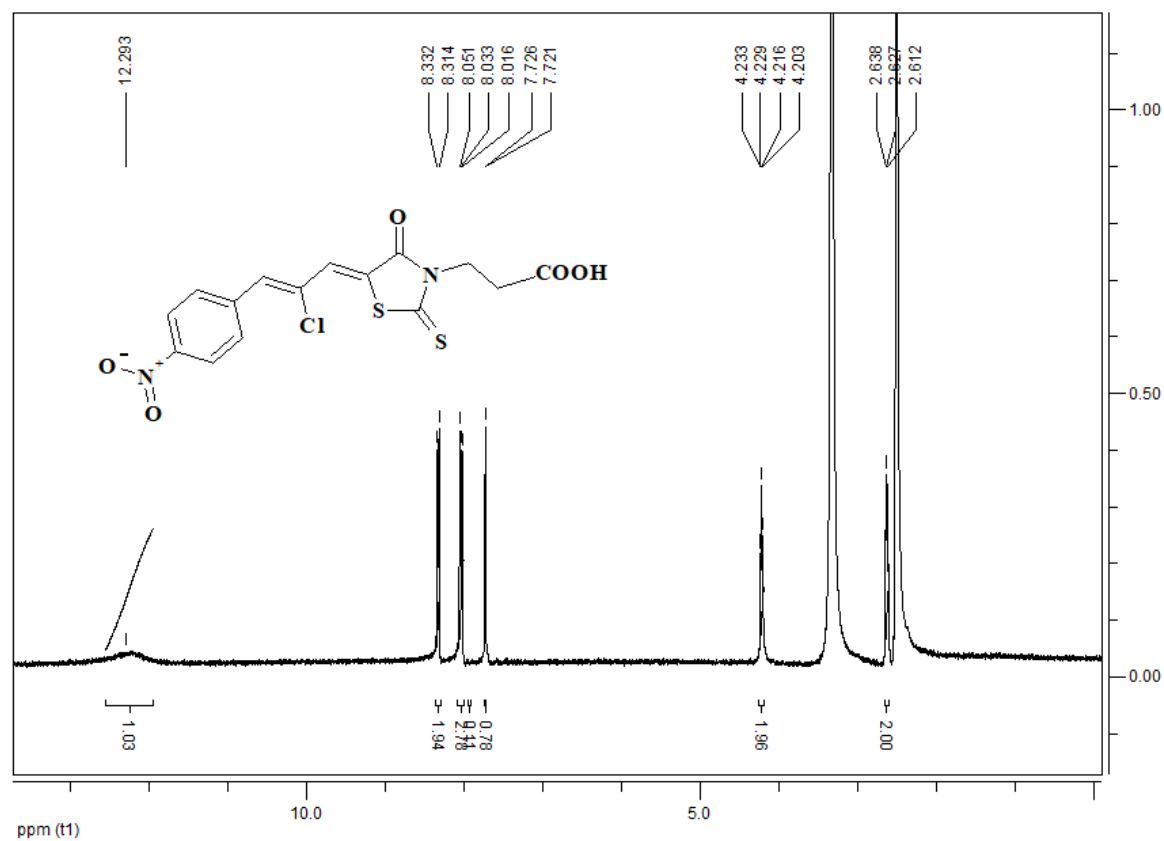Figure S12. <sup>1</sup>H NMR spectrum 2h.

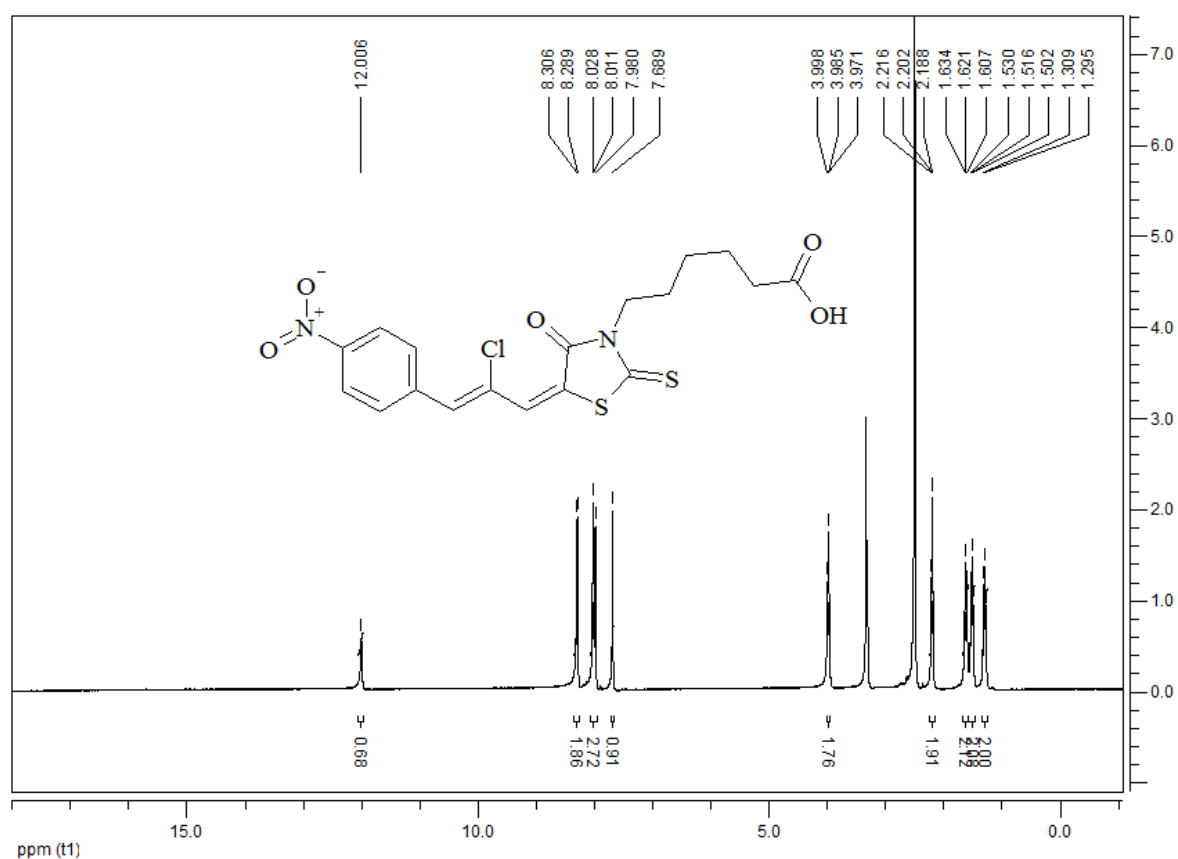Figure S13. <sup>1</sup>H NMR spectrum 2i.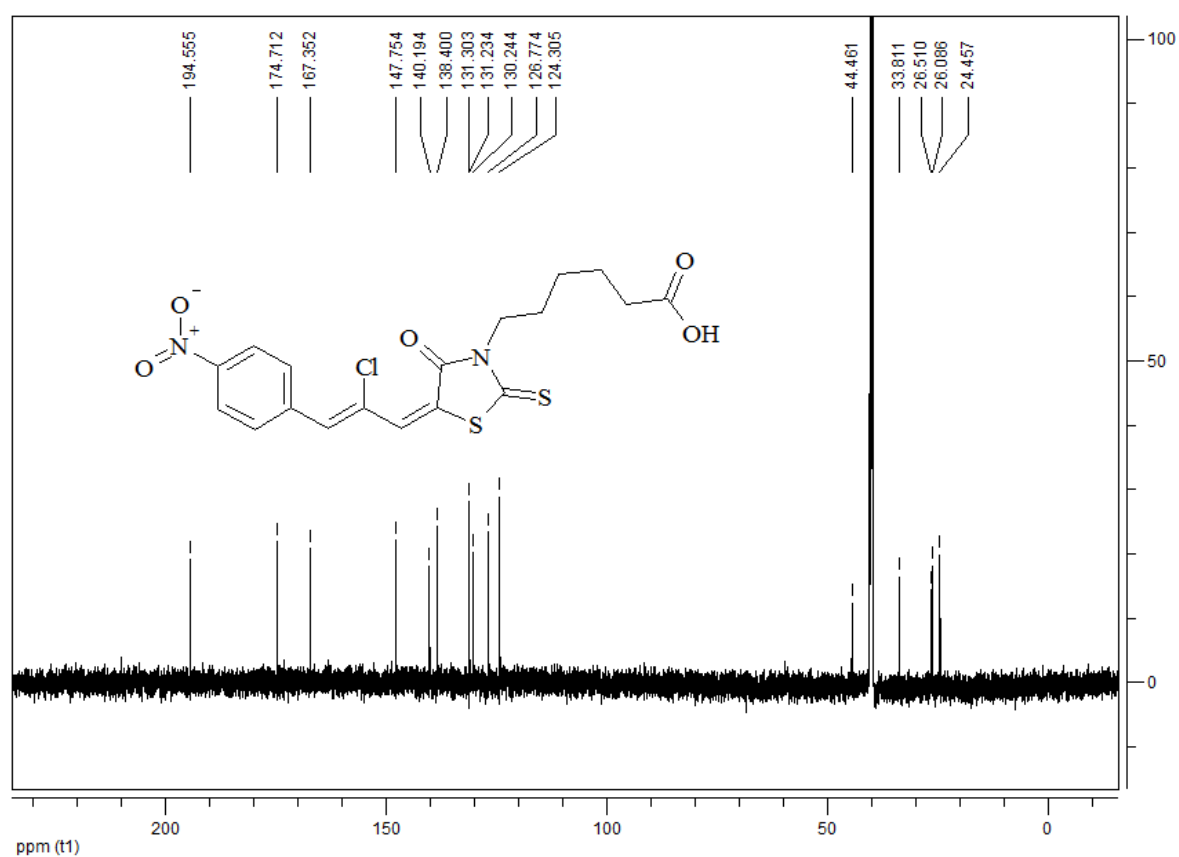Figure S14. <sup>13</sup>C NMR spectrum 2i.



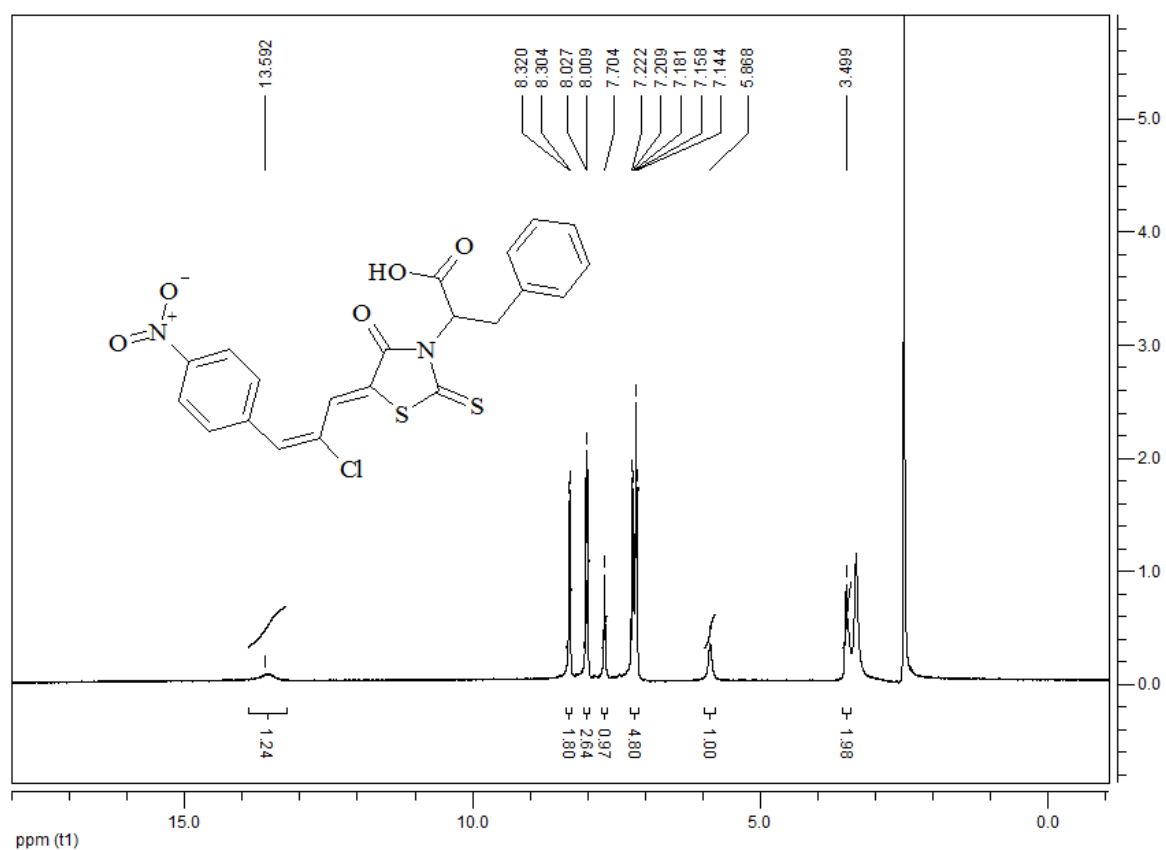Figure S15. <sup>1</sup>H NMR spectrum 2j.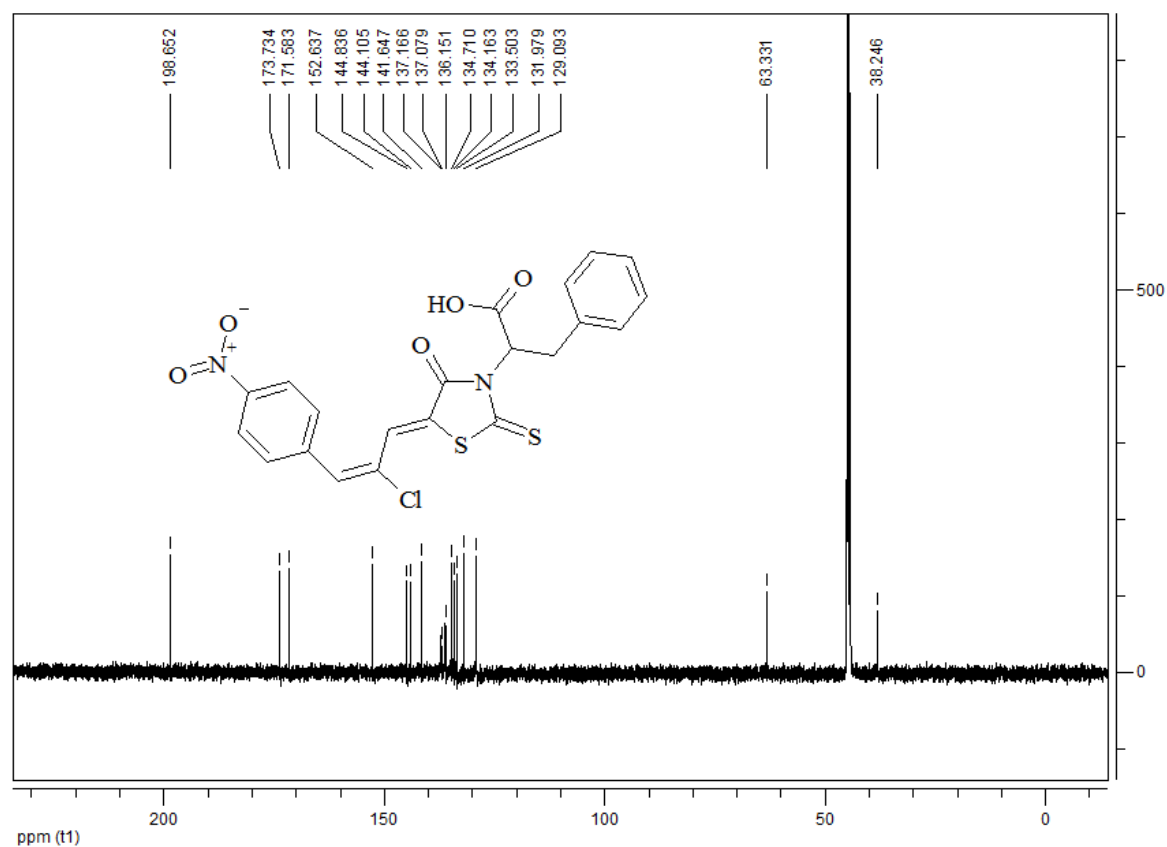Figure S14. <sup>13</sup>C NMR spectrum 2j.

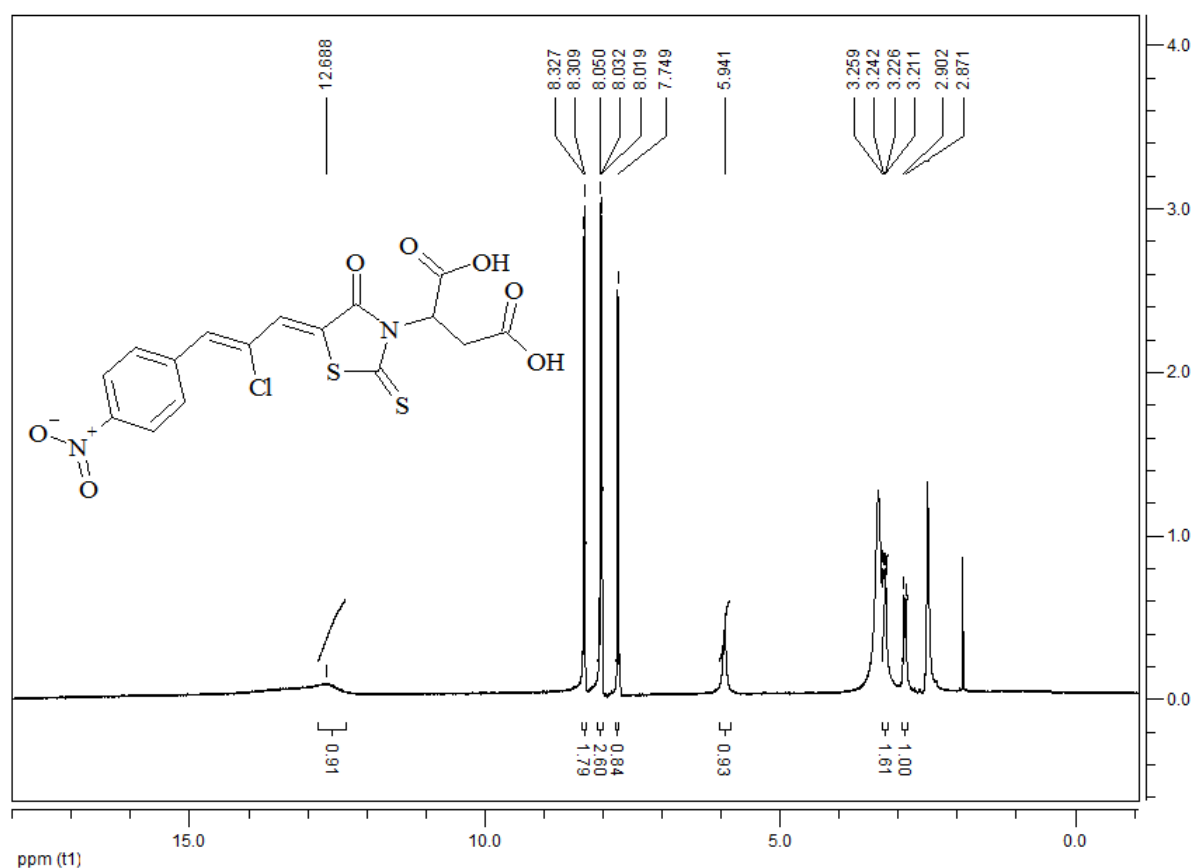Figure S15. <sup>1</sup>H NMR spectrum 2k.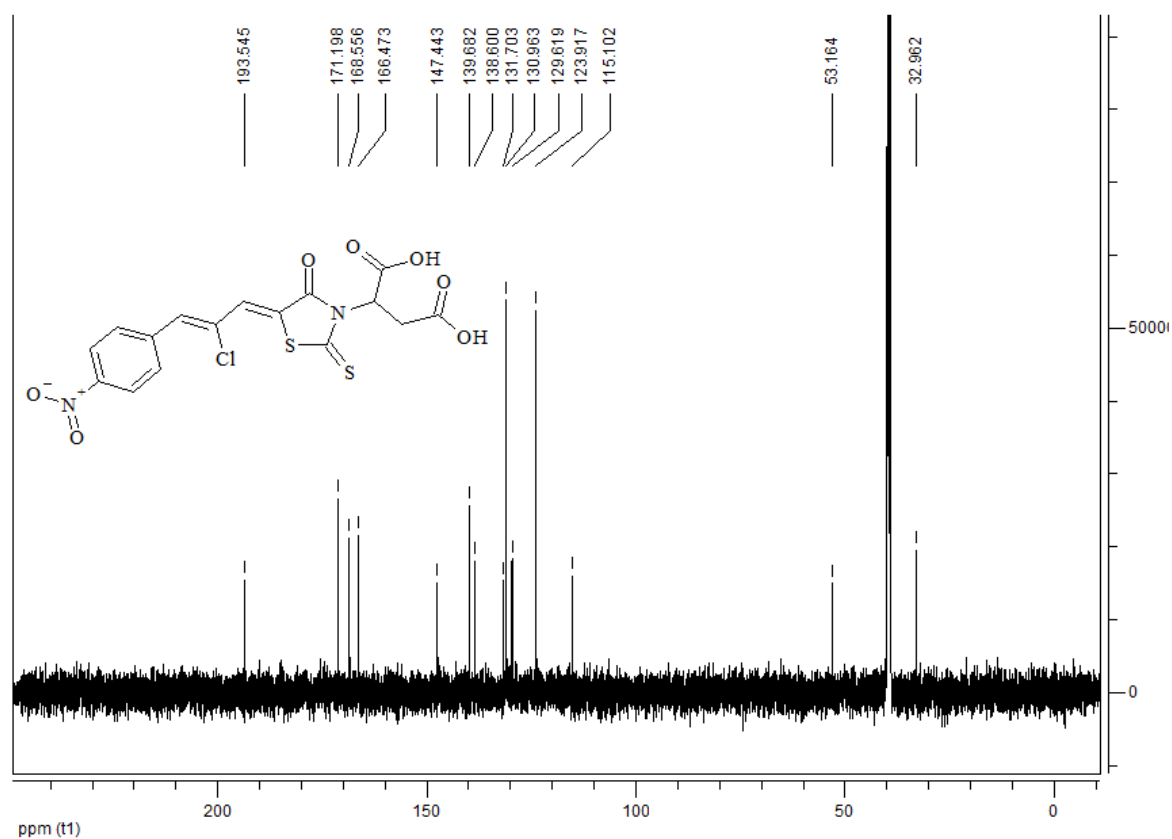Figure S14. <sup>13</sup>C NMR spectrum 2k.

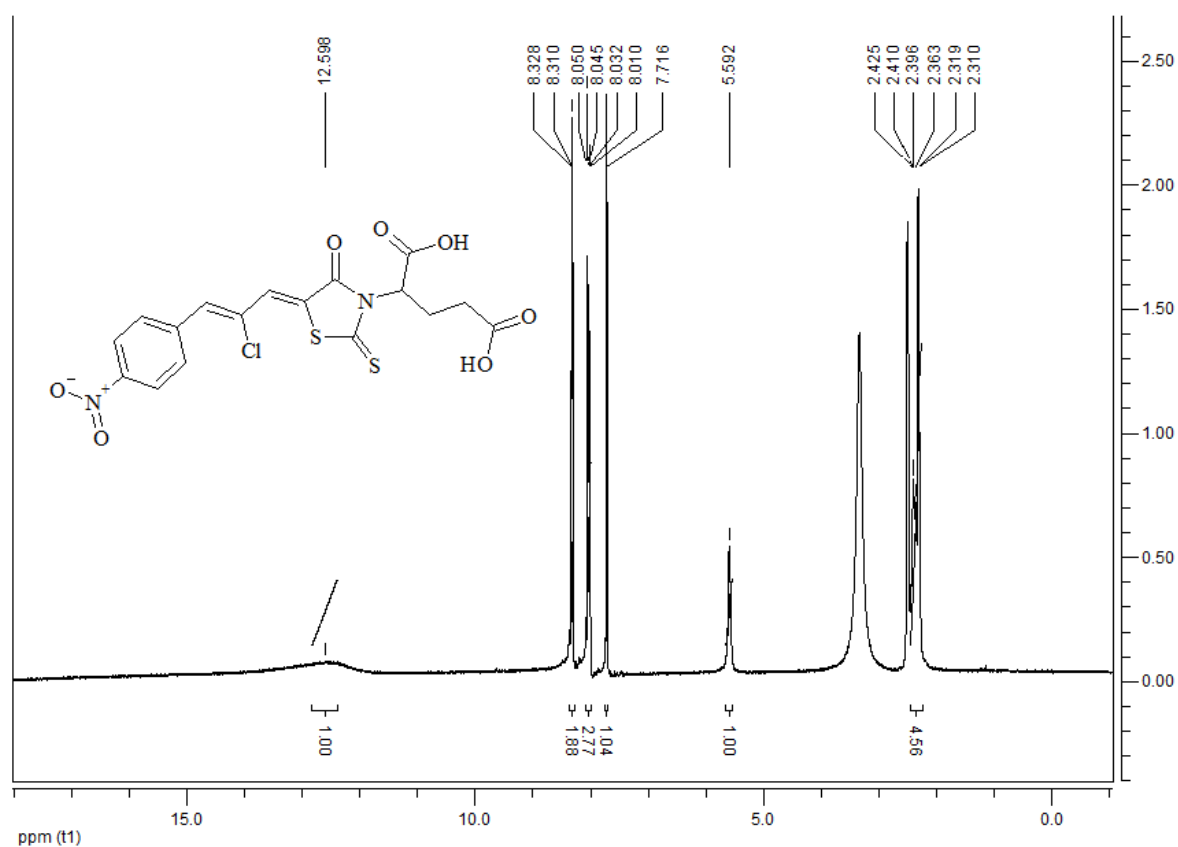Figure S15. <sup>1</sup>H NMR spectrum 2l.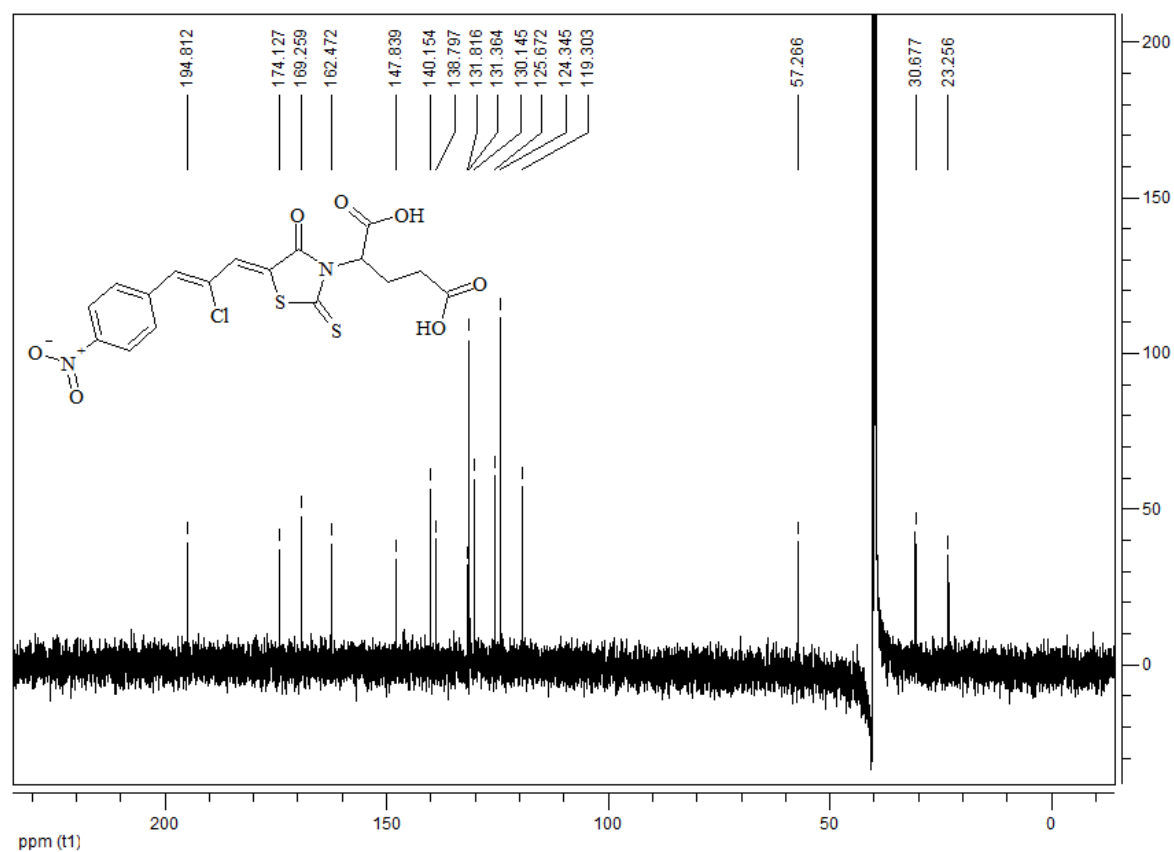Figure S16. <sup>13</sup>C NMR spectrum 2l.
